# Supplementary material
Source: PubMed Central journal article supplement (PMC9463194)
Supplement: 11739_2022_3000_MOESM1_ESM.pdf [file 11739_2022_3000_MOESM1_ESM.pdf]

### Supplementary figure 1.

**Prevalence of metabolic comorbidities according to SARS-COV-2 infection severity (n=382).** Bars represent prevalence of Non-severe SARS-COV2 infection (grey, n=226) and severe SARS-COV2 infection (black, n=156) in patients with obesity, hypertension, type 2 diabetes (T2DM) and dyslipidemia. Prevalence expressed as %. Significance for  $p < 0.05$  (\*) and  $p < 0.1$  (\*\*)

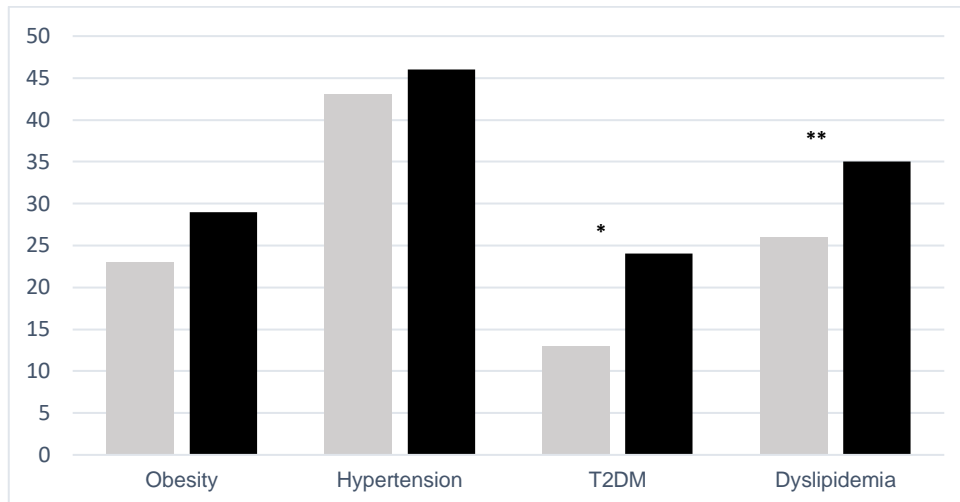

\*data on obesity available in 271 patients (not severe= 149, severe=122)  
ABBREVIATIONS: T2DM: type 2 diabetes mellitus
